# Supplementary material for: GTP-Binding-Defective ARL4D Alters Mitochondrial Morphology and Membrane Potential
Source: PubMed Central journal article supplement (PMC3424131; doi:10.1371/journal.pone.0043552), 2012-08-21

ARL4D(T35N)

H33258

$\beta$ COP

Calnexin

EEA1

Transferrin

M6PR

Lamp-1

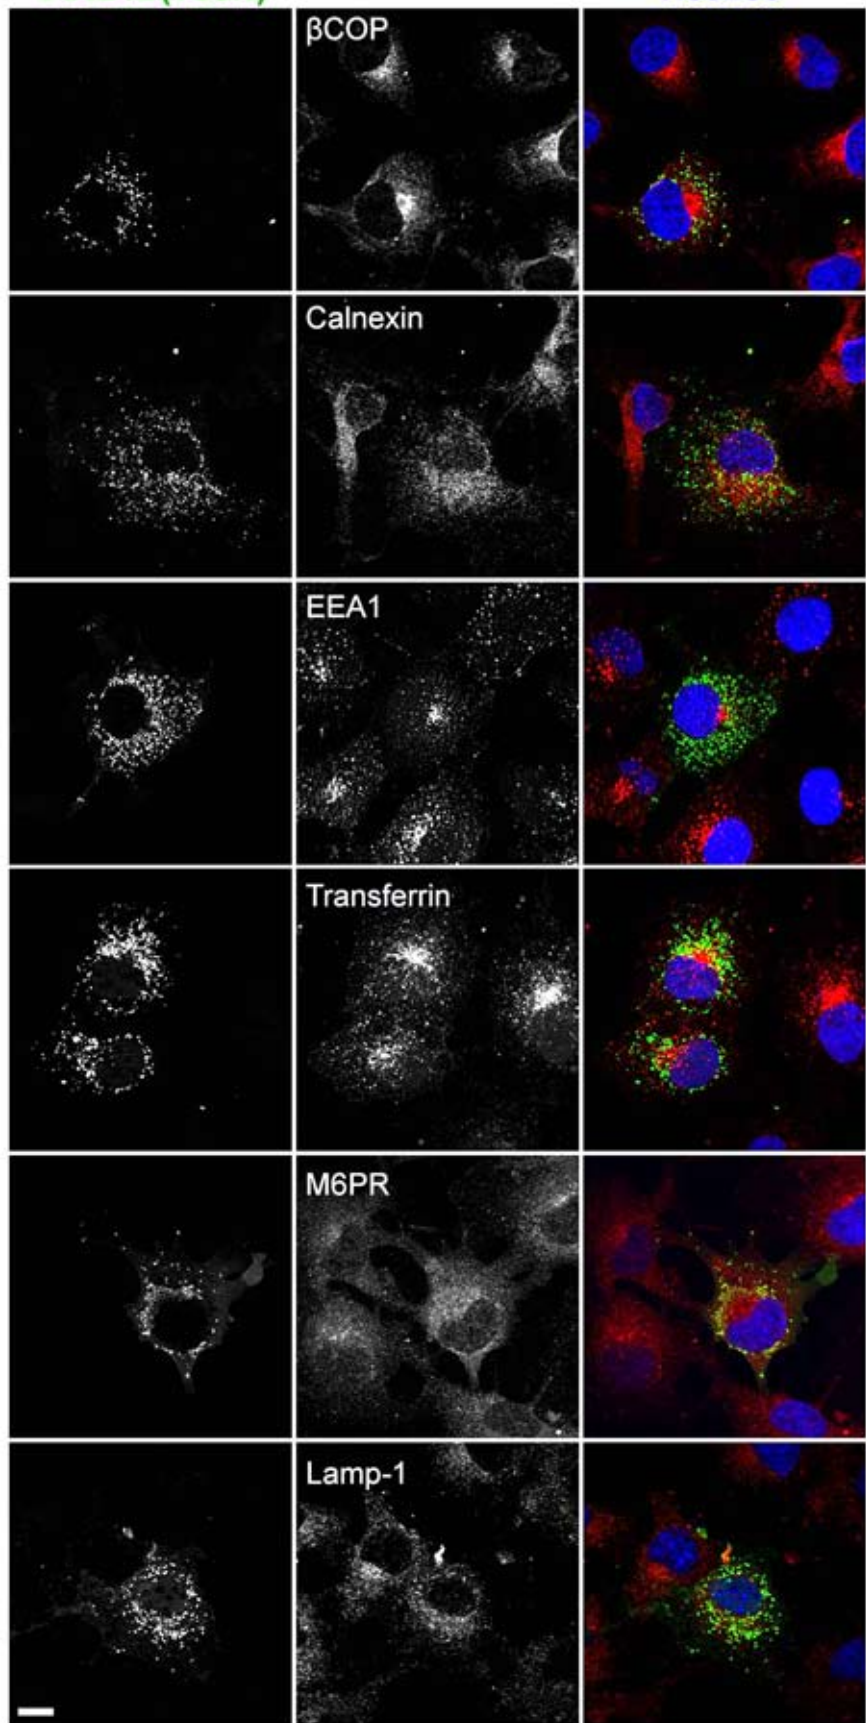

Supplement: pone.0043552.s001.pdf [file pone.0043552.s001.pdf]
