# Supplementary material for: GTP-Binding-Defective ARL4D Alters Mitochondrial Morphology and Membrane Potential
Source: PubMed Central journal article supplement (PMC3424131; doi:10.1371/journal.pone.0043552), 2012-08-21

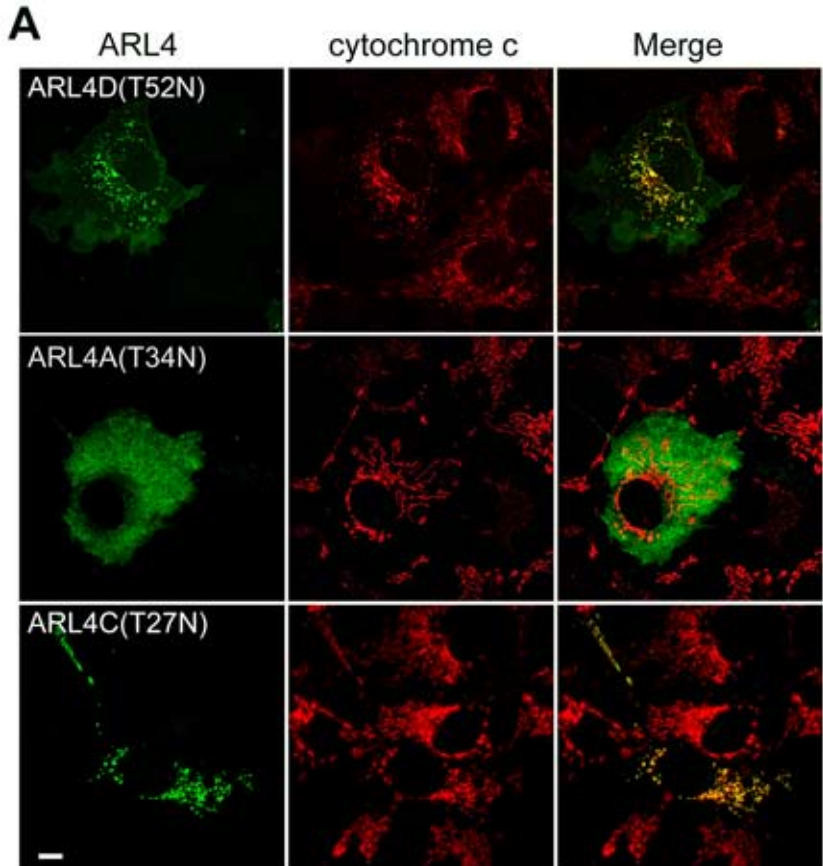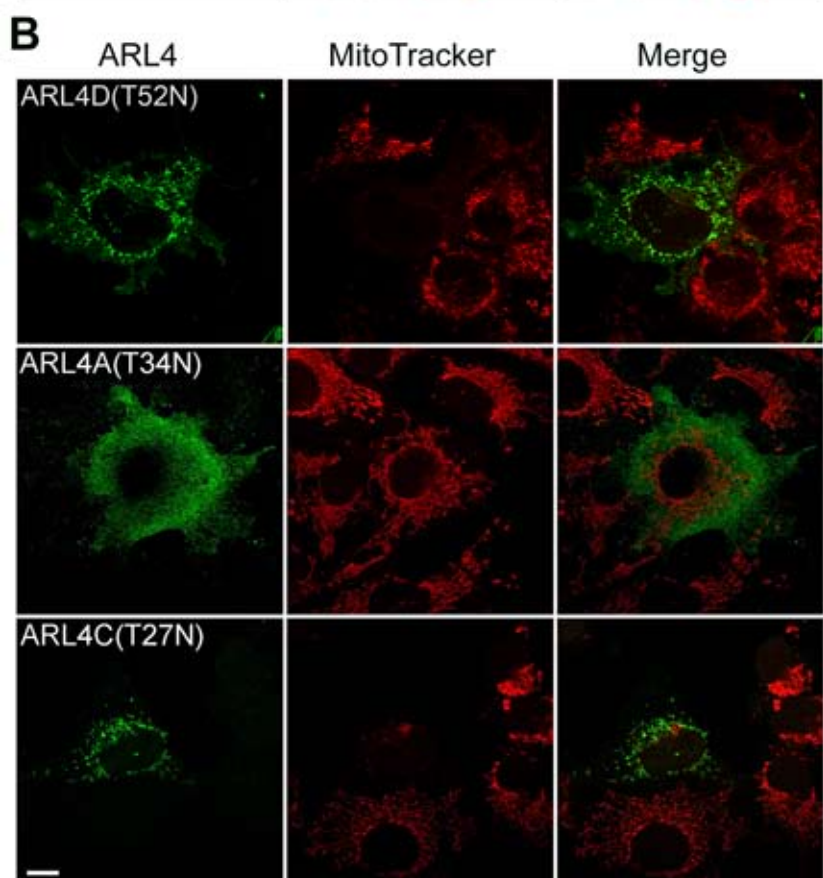

Supplement: pone.0043552.s002.pdf [file pone.0043552.s002.pdf]
